# Supplementary material for: Adverse Effects of COVID-19 Vaccination: Machine Learning and Statistical Approach to Identify and Classify Incidences of Morbidity and Postvaccination Reactogenicity
Source: MDPI journal article supplement (doi:10.3390/healthcare11010031), 2022-12-22
Supplement: s1 [file s1]

Supplementary Table S1: Coefficient values of the patient's medical history after machine learning model training for target variable Died

| Features                  | RF        | LGBM | DT        | XGB       | GBM       |
|---------------------------|-----------|------|-----------|-----------|-----------|
| Age                       | 0.485771  | 942  | 0.6452226 | 0.1245845 | 0.5455121 |
| Gender                    | 0.1675705 | 407  | 0.1367884 | 0.1093783 | 0.1631078 |
| Taking other medicine     | 0.0545965 | 220  | 0.0475745 | 0.0673434 | 0.0350146 |
| Prior Vaccine             | 0.0091065 | 67   | 0.0030951 | 0.0509157 | 0.0145328 |
| Allergic History          | 0.0244581 | 143  | 0.0179043 | 0.0414204 | 0.0101271 |
| Type-2 Diabetes           | 0.0227197 | 112  | 0.0119516 | 0.0312908 | 0.0179126 |
| Hypertension              | 0.0447308 | 79   | 0.0179856 | 0.0367234 | 0.0390901 |
| Arthritis                 | 0.0041013 | 43   | 0.0049471 | 0.0233567 | 0.000932  |
| Asthma                    | 0.0067543 | 49   | 0.005158  | 0.0261796 | 0.0036572 |
| Migraine                  | 0.0013154 | 13   | 0.0006978 | 0.0086436 | 0.0006018 |
| High Cholesterol          | 0.0049735 | 49   | 0.0035152 | 0.0221677 | 0.0046422 |
| Abnormal Blood Pressure   | 0.00785   | 65   | 0.0060055 | 0.0529463 | 0.0067236 |
| COPD                      | 0.0312861 | 93   | 0.0226397 | 0.0566736 | 0.0419738 |
| GERD                      | 0.0091695 | 53   | 0.003867  | 0.0201832 | 0.0042683 |
| Anxiety                   | 0.002163  | 13   | 0.0010229 | 0.0051668 | 6.13E-05  |
| Obesity                   | 0.0145271 | 94   | 0.0179046 | 0.0497325 | 0.0168409 |
| Depression                | 0.0033758 | 38   | 0.0038322 | 0.0225264 | 0.0012705 |
| Thyroid Disorder          | 0.0064078 | 53   | 0.0061626 | 0.0253098 | 0.0010826 |
| Anemia                    | 0.0048687 | 42   | 0.0074102 | 0.0246055 | 0.0019226 |
| Dementia                  | 0.0172876 | 50   | 0.0024169 | 0.0254867 | 0.0200888 |
| Cancer                    | 0.0045387 | 43   | 0.0026994 | 0.0212076 | 0.0036328 |
| Kidney Disease            | 0.0112692 | 60   | 0.0057147 | 0.0320093 | 0.0167698 |
| Hyperlipidemia            | 0.0206609 | 50   | 0.0028132 | 0.0234155 | 0.0141904 |
| Heart Disease             | 0.0264228 | 68   | 0.0091028 | 0.0307607 | 0.0300771 |
| Covid-19 positive history | 0.0062515 | 73   | 0.008084  | 0.038479  | 0.0017898 |
| Atrial Fibrillation       | 0.0041862 | 40   | 0.0023417 | 0.0141483 | 0.0024952 |
| Pain Symptoms             | 0.0036374 | 41   | 0.0031425 | 0.0153447 | 0.001682  |

Supplementary Table S2: Coefficient values of the patient's medical history after machine learning model training for target variable SARS-CoV-2 Positive

| Features                  | RF        | LGBM | DT        | XGB       | GBM       |
|---------------------------|-----------|------|-----------|-----------|-----------|
| Age                       | 0.5031024 | 1013 | 0.4848036 | 0.0718361 | 0.4794835 |
| Gender                    | 0.1448509 | 371  | 0.1407043 | 0.0790358 | 0.2039688 |
| Taking other medicine     | 0.0343001 | 183  | 0.0474763 | 0.0535841 | 0.0464872 |
| Prior Vaccine             | 0.0277164 | 116  | 0.0332161 | 0.0537374 | 0.0291541 |
| Allergic History          | 0.0332022 | 180  | 0.0498366 | 0.0315843 | 0.0283585 |
| Type-2 Diabetes           | 0.0163823 | 65   | 0.0167252 | 0.0292931 | 0.0156867 |
| Hypertension              | 0.0235027 | 71   | 0.0170618 | 0.0328357 | 0.0193941 |
| Arthritis                 | 0.0123351 | 53   | 0.0112209 | 0.0371482 | 0.00664   |
| Asthma                    | 0.0243393 | 105  | 0.0268061 | 0.0493217 | 0.022032  |
| Migraine                  | 0.007955  | 50   | 0.007508  | 0.0294603 | 0.00418   |
| High Cholesterol          | 0.0087637 | 33   | 0.0094759 | 0.0292113 | 0.0053496 |
| Abnormal Blood Pressure   | 0.0173137 | 72   | 0.0175617 | 0.0502221 | 0.0178796 |
| COPD                      | 0.0105335 | 36   | 0.0058998 | 0.0341863 | 0.0163968 |
| GERD                      | 0.010629  | 49   | 0.008611  | 0.0374572 | 0.0142622 |
| Anxiety                   | 0.0087206 | 36   | 0.0090865 | 0.020828  | 0.005587  |
| Obesity                   | 0.0090663 | 44   | 0.0082768 | 0.0267975 | 0.0062914 |
| Depression                | 0.0094441 | 34   | 0.0090157 | 0.0312226 | 0.0112459 |
| Thyroid Disorder          | 0.0201361 | 100  | 0.0221342 | 0.0439322 | 0.0211008 |
| Anemia                    | 0.0052753 | 37   | 0.006475  | 0.0240324 | 0.0035913 |
| Dementia                  | 0.0030516 | 12   | 0.0034611 | 0.0160027 | 0.000593  |
| Cancer                    | 0.0087461 | 36   | 0.00671   | 0.0253861 | 0.0022681 |
| Kidney Disease            | 0.0076138 | 43   | 0.0080313 | 0.0219994 | 0.003952  |
| Hyperlipidemia            | 0.0139955 | 41   | 0.0087125 | 0.0368747 | 0.0135405 |
| Heart Disease             | 0.010827  | 70   | 0.0097856 | 0.0355662 | 0.0089541 |
| Covid-19 positive history | 0.0158452 | 95   | 0.0188252 | 0.0549697 | 0.0082607 |
| Atrial Fibrillation       | 0.0031065 | 9    | 0.0033236 | 0.0112322 | 0.0001634 |
| Pain Symptoms             | 0.0092457 | 46   | 0.009255  | 0.0322427 | 0.0051788 |

Supplementary Table S3: Coefficient values of the patient's medical history after machine learning model training for target variable Hospitalized

| Features                  | RF        | LGBM | DT        | XGB       | GBM       |
|---------------------------|-----------|------|-----------|-----------|-----------|
| Age                       | 0.4659203 | 785  | 0.5529693 | 0.0795364 | 0.539623  |
| Gender                    | 0.1415945 | 374  | 0.111549  | 0.0564173 | 0.13729   |
| Taking other medicine     | 0.0279721 | 161  | 0.0181093 | 0.0281842 | 0.016261  |
| Prior Vaccine             | 0.0245912 | 92   | 0.0372044 | 0.0705576 | 0.0283945 |
| Allergic History          | 0.0336667 | 149  | 0.0311539 | 0.0398741 | 0.0178627 |
| Type-2 Diabetes           | 0.0408495 | 101  | 0.0292529 | 0.0473447 | 0.0457905 |
| Hypertension              | 0.0670752 | 107  | 0.0712576 | 0.1062071 | 0.0703976 |
| Arthritis                 | 0.0070962 | 51   | 0.0068206 | 0.0198634 | 0.0020683 |
| Asthma                    | 0.0109516 | 69   | 0.0091428 | 0.0332873 | 0.0030911 |
| Migraine                  | 0.0068353 | 60   | 0.0085569 | 0.0280571 | 0.0044619 |
| High Cholesterol          | 0.0056054 | 54   | 0.005922  | 0.0127428 | 0.0013421 |
| Abnormal Blood Pressure   | 0.011027  | 65   | 0.0108181 | 0.030553  | 0.0083601 |
| COPD                      | 0.0230241 | 68   | 0.0144266 | 0.0664303 | 0.0320645 |
| GERD                      | 0.0160587 | 68   | 0.0112016 | 0.0355828 | 0.0224099 |
| Anxiety                   | 0.0090031 | 72   | 0.0105052 | 0.0338302 | 0.00572   |
| Obesity                   | 0.0113968 | 80   | 0.0094128 | 0.0477429 | 0.0098182 |
| Depression                | 0.0096938 | 74   | 0.0083476 | 0.03487   | 0.0061815 |
| Thyroid Disorder          | 0.0104579 | 73   | 0.0090196 | 0.0302862 | 0.0016401 |
| Anemia                    | 0.0062806 | 60   | 0.0046143 | 0.031536  | 0.0036639 |
| Dementia                  | 0.0036156 | 26   | 0.0020225 | 0.0085986 | 0.0011769 |
| Cancer                    | 0.0080139 | 61   | 0.0064022 | 0.0183649 | 0.0044396 |
| Kidney Disease            | 0.010807  | 75   | 0.0070791 | 0.0389908 | 0.0130753 |
| Hyperlipidemia            | 0.024026  | 62   | 0.0040508 | 0.0325605 | 0.0205371 |
| Heart Disease             | 0.0098778 | 63   | 0.0050901 | 0.0194216 | 0.0003338 |
| Covid-19 positive history | 0.0065354 | 78   | 0.0074179 | 0.0261971 | 0.0017782 |
| Atrial Fibrillation       | 0.0016764 | 13   | 0.0013519 | 0.0050953 | 1.84E-05  |
| Pain Symptoms             | 0.0063477 | 59   | 0.0063012 | 0.0178678 | 0.0021997 |

Supplementary Table S4: Coefficient values of the patient's reactions after machine learning model training for target variable Died

| Features                | RF        | LGBM | DT        | XGB       | GBM       |
|-------------------------|-----------|------|-----------|-----------|-----------|
| Hospital Stay Days      | 0.1903703 | 346  | 0.3475123 | 0.041893  | 0.355557  |
| Disable                 | 0.0416797 | 93   | 0.0244903 | 0.0416867 | 0.0537616 |
| Headache                | 0.0452953 | 111  | 0.0143977 | 0.0127466 | 0.0352031 |
| Pyrexia                 | 0.0197745 | 126  | 0.0262676 | 0.0064219 | 0.0003904 |
| Dyspnoea                | 0.0148237 | 79   | 0.0148488 | 0.0041827 | 0.0004468 |
| Fatigue                 | 0.0303269 | 97   | 0.0301042 | 0.0078205 | 0.0143229 |
| Chills                  | 0.032794  | 45   | 0.0103741 | 0.0201617 | 0.0319619 |
| Pain                    | 0.1106506 | 129  | 0.0326766 | 0.0147198 | 0.1134494 |
| Dizziness               | 0.0254569 | 63   | 0.0277695 | 0.0164378 | 0.0230102 |
| Nausea                  | 0.0241016 | 97   | 0.015461  | 0.0129678 | 0.0142858 |
| Pain in extremity       | 0.025879  | 100  | 0.0222244 | 0.0122159 | 0.0049445 |
| Asthenia                | 0.0131383 | 58   | 0.0093871 | 0.0121451 | 0.0068366 |
| Vomiting                | 0.0104165 | 86   | 0.0119724 | 0.005617  | 0.0002906 |
| Malaise                 | 0.0092769 | 45   | 0.0074977 | 0.0087954 | 0.0019401 |
| Cough                   | 0.0139219 | 69   | 0.0194309 | 0.0061933 | 0.0003379 |
| Injection site pain     | 0.0057959 | 23   | 0.0066554 | 0.006071  | 0.0008008 |
| Myalgia                 | 0.0172028 | 62   | 0.0096872 | 0.0152721 | 0.0202019 |
| Hypoaesthesia           | 0.0108674 | 39   | 0.0073745 | 0.0228748 | 0.0065187 |
| Chest pain              | 0.0135525 | 93   | 0.0156423 | 0.0113201 | 0.0023431 |
| Feeling abnormal        | 0.009821  | 38   | 0.008313  | 0.0297487 | 0.0080927 |
| Rash                    | 0.0158605 | 48   | 0.0071569 | 0.015304  | 0.0123756 |
| Condition aggravated    | 0.0083364 | 41   | 0.0191574 | 0.0058287 | 0.0005089 |
| Chest discomfort        | 0.0083001 | 34   | 0.0051959 | 0.02178   | 0.0080591 |
| Arthralgia              | 0.0267916 | 49   | 0.0098278 | 0.0371636 | 0.0267478 |
| Paraesthesia            | 0.0159687 | 45   | 0.004918  | 0.0301733 | 0.0138342 |
| Unresponsive to stimuli | 0.0313612 | 35   | 0.08305   | 0.1077292 | 0.0723123 |
| Diarrhoea               | 0.0092694 | 38   | 0.0099459 | 0.0044498 | 0.0016297 |
| Pruritus                | 0.0103272 | 35   | 0.0053515 | 0.0160232 | 0.0071925 |
| Heart rate increased    | 0.0130296 | 43   | 0.0054152 | 0.0246357 | 0.0091978 |

|                          |           |    |           |           |           |
|--------------------------|-----------|----|-----------|-----------|-----------|
| Urticaria                | 0.0356855 | 54 | 0.0107984 | 0.0393831 | 0.0387532 |
| Facial paralysis         | 0.0047323 | 32 | 0.0004634 | 0.0149116 | 0.0031853 |
| Syncope                  | 0.0113586 | 74 | 0.0245817 | 0.0165097 | 0.0047024 |
| Tachycardia              | 0.0051666 | 29 | 0.0037222 | 0.0086795 | 0.001124  |
| Palpitations             | 0.0099865 | 48 | 0.0062424 | 0.0094562 | 0.0062374 |
| Hyperhidrosis            | 0.0075586 | 39 | 0.0048995 | 0.0185066 | 0.0051158 |
| Erythema                 | 0.0119586 | 35 | 0.0085241 | 0.010247  | 0.0098973 |
| Throat tightness         | 0.003522  | 29 | 0.0009619 | 0.0115257 | 0.0014969 |
| Tremor                   | 0.0020653 | 18 | 0.0016465 | 0.0051084 | 5.98E-05  |
| Blood pressure increased | 0.0021275 | 14 | 0.0019292 | 0.0042077 | 2.42E-10  |
| Anaphylactic reaction    | 0.0031129 | 28 | 0.0001953 | 0.0106264 | 0.0016856 |
| Intensive care           | 0.0040045 | 45 | 0.0072163 | 0.0085449 | 0.0001251 |
| Loss of consciousness    | 0.0102666 | 42 | 0.0064619 | 0.0223929 | 0.0083739 |
| Decreased appetite       | 0.0077454 | 40 | 0.0177556 | 0.0059726 | 0.0004035 |
| Muscular weakness        | 0.0018982 | 15 | 0.0005585 | 0.0126424 | 0.0004206 |
| Flushing                 | 0.0019723 | 22 | 0.000836  | 0.0053028 | 0.0010136 |
| Mobility decreased       | 0.0059498 | 42 | 0.0057817 | 0.0156649 | 0.0029296 |
| Injection site erythema  | 0.0046106 | 23 | 0.0035957 | 0.0190568 | 0.0019645 |
| Feeling hot              | 0.0036999 | 26 | 0.0019961 | 0.0103446 | 0.0006944 |
| Abdominal pain           | 0.0060206 | 40 | 0.0064547 | 0.0079246 | 0.000669  |
| Injection site swelling  | 0.0047753 | 43 | 0.0013845 | 0.0121895 | 0.000793  |
| Cerebrovascular accident | 0.0018206 | 17 | 0.0026256 | 0.006518  | 9.95E-06  |
| Cardiac arrest           | 0.0255325 | 34 | 0.0642041 | 0.1109572 | 0.0390972 |
| Lymphadenopathy          | 0.020039  | 44 | 0.0050593 | 0.0409477 | 0.0246942 |

Supplementary Table S5: Coefficient values of the patient's reactions after machine learning model training for target variable SARS-CoV-2 Positive

| Features           | RF      | LGBM | DT        | XGB       | GBM       |
|--------------------|---------|------|-----------|-----------|-----------|
| Hospital Stay Days | 0.02429 | 229  | 0.018705  | 0.004737  | 0.0001559 |
| Disable            | 0.00586 | 43   | 0.0047771 | 0.0186074 | 0.0060365 |
| Headache           | 0.03986 | 136  | 0.0234414 | 0.0155864 | 0.0260355 |

|                         |         |     |           |           |           |
|-------------------------|---------|-----|-----------|-----------|-----------|
| Pyrexia                 | 0.01265 | 110 | 0.0145    | 0.003798  | 0.0011235 |
| Dyspnoea                | 0.02188 | 90  | 0.0211586 | 0.0050748 | 0.0201007 |
| Fatigue                 | 0.02292 | 162 | 0.0180316 | 0.0085624 | 0.0060807 |
| Chills                  | 0.01598 | 94  | 0.013013  | 0.0099961 | 0.0094973 |
| Pain                    | 0.05858 | 150 | 0.0130282 | 0.0159628 | 0.0935004 |
| Dizziness               | 0.05109 | 61  | 0.0704763 | 0.0351982 | 0.0721778 |
| Nausea                  | 0.01018 | 68  | 0.0075318 | 0.0050794 | 0.000893  |
| Pain in extremity       | 0.08514 | 64  | 0.1388041 | 0.0749193 | 0.1104952 |
| Asthenia                | 0.01211 | 64  | 0.0121799 | 0.0057585 | 0.0003797 |
| Vomiting                | 0.00954 | 68  | 0.0076787 | 0.0075908 | 0.0002919 |
| Malaise                 | 0.00491 | 48  | 0.0041958 | 0.002784  | 0.0005362 |
| Cough                   | 0.07991 | 106 | 0.0892575 | 0.0404813 | 0.0692667 |
| Injection site pain     | 0.02347 | 57  | 0.0320557 | 0.0308696 | 0.0216211 |
| Myalgia                 | 0.01644 | 67  | 0.0122118 | 0.0146521 | 0.0132853 |
| Hypoaesthesia           | 0.02785 | 46  | 0.0367351 | 0.0447536 | 0.0380497 |
| Chest pain              | 0.0069  | 76  | 0.005974  | 0.0031296 | 0.0007596 |
| Feeling abnormal        | 0.00523 | 41  | 0.0043066 | 0.0036289 | 0.0018389 |
| Rash                    | 0.06549 | 56  | 0.0700644 | 0.0819563 | 0.0893059 |
| Condition aggravated    | 0.00302 | 23  | 0.0019546 | 0.0022993 | 0.0001535 |
| Chest discomfort        | 0.00617 | 50  | 0.0038683 | 0.006863  | 0.0026881 |
| Arthralgia              | 0.03497 | 69  | 0.0395472 | 0.023979  | 0.0482764 |
| Paraesthesia            | 0.02813 | 49  | 0.0233114 | 0.0390566 | 0.0256564 |
| Unresponsive to stimuli | 0.00148 | 22  | 0.000823  | 0.0094224 | 0.000337  |
| Diarrhoea               | 0.00613 | 51  | 0.0037677 | 0.0043507 | 0.0006596 |
| Pruritus                | 0.02588 | 52  | 0.0019437 | 0.0150777 | 0.0320001 |
| Heart rate increased    | 0.01006 | 37  | 0.0093696 | 0.0216841 | 0.0111617 |
| Urticaria               | 0.07675 | 66  | 0.0956275 | 0.0746705 | 0.0965025 |
| Facial paralysis        | 0.00166 | 19  | 0.0007136 | 0.0061165 | 0.0004446 |
| Syncope                 | 0.02758 | 41  | 0.0262782 | 0.0525882 | 0.032473  |
| Tachycardia             | 0.00123 | 8   | 0.0005035 | 0.0029566 | 3.29E-05  |
| Palpitations            | 0.01349 | 51  | 0.0161454 | 0.0098082 | 0.0137491 |
| Hyperhidrosis           | 0.00609 | 38  | 0.0016526 | 0.0091826 | 0.0018836 |

|                          |         |    |           |           |           |
|--------------------------|---------|----|-----------|-----------|-----------|
| Erythema                 | 0.04316 | 56 | 0.0494311 | 0.0431256 | 0.0573969 |
| Throat tightness         | 0.001   | 30 | 0.0004688 | 0.0041164 | 0.0002101 |
| Tremor                   | 0.01141 | 46 | 0.0109377 | 0.029027  | 0.0105478 |
| Blood pressure increased | 0.00586 | 36 | 0.0049054 | 0.0190234 | 0.0044525 |
| Anaphylactic reaction    | 0.00581 | 44 | 0.0061079 | 0.0158962 | 0.0037329 |
| Intensive care           | 0.00161 | 20 | 0.0019739 | 0.0034721 | 0.0001371 |
| Loss of consciousness    | 0.01363 | 38 | 0.0132857 | 0.0345504 | 0.0140706 |
| Decreased appetite       | 0.00136 | 8  | 0.0005827 | 0.001236  | 0.0001006 |
| Muscular weakness        | 0.00199 | 25 | 0.0015437 | 0.0027713 | 3.18E-07  |
| Flushing                 | 0.00178 | 26 | 0.0010274 | 0.0066711 | 5.36E-05  |
| Mobility decreased       | 0.00324 | 31 | 0.0010822 | 0.01187   | 0.0007659 |
| Injection site erythema  | 0.00449 | 29 | 0.0012876 | 0.0067546 | 0.0019953 |
| Feeling hot              | 0.00396 | 40 | 0.0027983 | 0.0121516 | 0.0015767 |
| Abdominal pain           | 0.00876 | 45 | 0.0022915 | 0.0091265 | 0.0016414 |
| Injection site swelling  | 0.0073  | 40 | 0.0062185 | 0.0139018 | 0.0025121 |
| Cerebrovascular accident | 0.00133 | 20 | 0.0016162 | 0.0065091 | 0.0002716 |
| Cardiac arrest           | 0.00042 | 1  | 0.000337  | 0.0003451 | 0         |
| Lymphadenopathy          | 0.03998 | 53 | 0.0504716 | 0.0682699 | 0.0530847 |

Supplementary Table S6: Coefficient values of the patient's reactions after machine learning model training for target variable Hospitalized

| Features           | RF        | LGBM | DT        | XGB       | GBM       |
|--------------------|-----------|------|-----------|-----------|-----------|
| Hospital Stay Days | 0.6687034 | 92   | 0.8551265 | 0.85527   | 0.8562615 |
| Disable            | 0.0032561 | 54   | 0.0026147 | 0.0030694 | 0.0005839 |
| Headache           | 0.0246609 | 141  | 0.0081884 | 0.0033423 | 0.0149533 |
| Pyrexia            | 0.0072799 | 123  | 0.0048537 | 0.0020887 | 0.0012887 |
| Dyspnoea           | 0.0105327 | 87   | 0.006728  | 0.0036965 | 0.0072617 |
| Fatigue            | 0.0194094 | 140  | 0.0068564 | 0.0020075 | 0.0041531 |
| Chills             | 0.0091291 | 94   | 0.0042592 | 0.0021964 | 0.0007499 |
| Pain               | 0.0547878 | 151  | 0.0117751 | 0.002796  | 0.0318569 |

|                          |           |     |           |           |           |
|--------------------------|-----------|-----|-----------|-----------|-----------|
| Dizziness                | 0.0147373 | 101 | 0.0043483 | 0.0026871 | 0.008703  |
| Nausea                   | 0.0068278 | 104 | 0.0040819 | 0.0021364 | 0.0024523 |
| Pain in extremity        | 0.0212071 | 78  | 0.0028998 | 0.0035341 | 0.0115743 |
| Asthenia                 | 0.0062028 | 103 | 0.0040037 | 0.002908  | 0.001243  |
| Vomiting                 | 0.0051188 | 87  | 0.0027095 | 0.0027048 | 0.0010821 |
| Malaise                  | 0.0045278 | 66  | 0.0035715 | 0.0027538 | 0.000275  |
| Cough                    | 0.0116455 | 85  | 0.01132   | 0.0056241 | 0.0068697 |
| Injection site pain      | 0.0031832 | 37  | 0.001911  | 0.0028845 | 6.52E-05  |
| Myalgia                  | 0.00925   | 59  | 0.0026346 | 0.0023493 | 0.013831  |
| Hypoaesthesia            | 0.0025748 | 57  | 0.000969  | 0.0017915 | 6.67E-05  |
| Chest pain               | 0.008336  | 86  | 0.0038228 | 0.0040397 | 0.0041367 |
| Feeling abnormal         | 0.008847  | 44  | 0.0022415 | 0.0040311 | 0.0059351 |
| Rash                     | 0.0056914 | 76  | 0.0021419 | 0.0038277 | 0.0006833 |
| Condition aggravated     | 0.0048675 | 65  | 0.0042118 | 0.0049347 | 0.0005142 |
| Chest discomfort         | 0.0018867 | 30  | 0.0009345 | 0.0012953 | 0.0001432 |
| Arthralgia               | 0.0097182 | 82  | 0.0023385 | 0.0021607 | 0.0040526 |
| Paraesthesia             | 0.0032082 | 44  | 0.0016921 | 0.0021377 | 8.69E-05  |
| Unresponsive to stimuli  | 0.0013914 | 13  | 0.0020047 | 0.0046616 | 2.50E-05  |
| Diarrhoea                | 0.0034889 | 31  | 0.0021744 | 0.0011097 | 1.28E-05  |
| Pruritus                 | 0.0063221 | 84  | 0.0046143 | 0.0057221 | 0.0012431 |
| Heart rate increased     | 0.0030004 | 33  | 0.001242  | 0.0014323 | 0.0006845 |
| Urticaria                | 0.0105858 | 45  | 0.0023086 | 0.0060186 | 0.0043937 |
| Facial paralysis         | 0.0003175 | 1   | 0.0003316 | 0.0004371 | 1.81E-06  |
| Syncope                  | 0.00287   | 34  | 0.0009123 | 0.0025751 | 0.0002753 |
| Tachycardia              | 0.0016531 | 32  | 0.0010562 | 0.0013642 | 8.35E-05  |
| Palpitations             | 0.0023352 | 38  | 0.001528  | 0.0032854 | 0.0004344 |
| Hyperhidrosis            | 0.0023346 | 36  | 0.0010139 | 0.0016319 | 0.001359  |
| Erythema                 | 0.0070281 | 42  | 0.0027882 | 0.0030867 | 0.0012304 |
| Throat tightness         | 0.0012839 | 27  | 0.0006308 | 0.0014705 | 2.71E-05  |
| Tremor                   | 0.0019958 | 59  | 0.0013914 | 0.0018026 | 0.0004675 |
| Blood pressure increased | 0.0008944 | 19  | 0.0002199 | 0.0011753 | 1.26E-05  |



|                          |           |    |           |           |           |
|--------------------------|-----------|----|-----------|-----------|-----------|
| Anaphylactic reaction    | 0.0002148 | 15 | 0.0002536 | 0.0012312 | 0         |
| Intensive care           | 0.0106942 | 60 | 0.0114348 | 0.0143812 | 0.0093363 |
| Loss of consciousness    | 0.0023901 | 50 | 0.0011929 | 0.0038017 | 0.0005167 |
| Decreased appetite       | 0.0015689 | 22 | 0.0007964 | 0.000838  | 1.51E-05  |
| Muscular weakness        | 0.001254  | 41 | 0.0007133 | 0.0028752 | 6.73E-06  |
| Flushing                 | 0.0008362 | 18 | 0.0001626 | 0.0010853 | 0.0001288 |
| Mobility decreased       | 0.0015981 | 31 | 0.0007234 | 0.0013362 | 0.0004741 |
| Injection site erythema  | 0.0011241 | 32 | 0.0009071 | 0.0017423 | 6.92E-05  |
| Feeling hot              | 0.0019689 | 19 | 0.0007015 | 0.0011408 | 6.28E-05  |
| Abdominal pain           | 0.0020432 | 37 | 0.0011975 | 0.0026802 | 0.0001006 |
| Injection site swelling  | 0.0017676 | 40 | 0.0009471 | 0.0033041 | 8.53E-05  |
| Cerebrovascular accident | 0.0009411 | 22 | 0.0006947 | 0.0009202 | 2.41E-05  |
| Cardiac arrest           | 0.000421  | 12 | 0.0003287 | 0.0011098 | 6.07E-05  |
| Lymphadenopathy          | 0.0020871 | 21 | 0.0014958 | 0.0015135 | 4.55E-05  |

Supplementary Table S7: P-values for the patient's medical history of statistical analysis

| <b>Features</b>         | Died      | SARS-CoV-2 test positive | Hospitalized |
|-------------------------|-----------|--------------------------|--------------|
| Age                     | 0         | 1.56E-176                | 0            |
| Gender                  | 8.93E-241 | 3.51E-117                | 0            |
| Taking other medicine   | 0.0023536 | 8.95E-12                 | 8.00E-22     |
| Prior Vaccine           | 9.73E-21  | 0.016866254              | 3.31E-67     |
| Allergic History        | 1.97E-06  | 0.068890892              | 2.91E-70     |
| Type-2 Diabetes         | 4.45E-159 | 1.38E-06                 | 0            |
| Hypertension            | 0         | 8.67E-19                 | 0            |
| Arthritis               | 1.19E-31  | 0.030490758              | 5.05E-105    |
| Asthma                  | 0.06353   | 0.917450232              | 0.001068276  |
| Migraine                | 9.72E-05  | 0.39110191               | 0.000627669  |
| High Cholesterol        | 0.4701951 | 0.950954946              | 2.58E-08     |
| Abnormal Blood Pressure | 0.0249393 | 0.154458671              | 2.42E-07     |

|                           |           |             |             |
|---------------------------|-----------|-------------|-------------|
| COPD                      | 1.48E-262 | 6.97E-27    | 0           |
| GERD                      | 1.47E-86  | 2.74E-15    | 2.63E-234   |
| Anxiety                   | 1.65E-10  | 4.21E-06    | 2.59E-54    |
| Obesity                   | 2.55E-76  | 1.99E-08    | 1.35E-145   |
| Depression                | 4.98E-20  | 1.58E-07    | 4.45E-81    |
| Thyroid Disorder          | 2.55E-37  | 0.460447051 | 7.45E-61    |
| Anemia                    | 2.34E-141 | 4.61E-12    | 4.88E-191   |
| Dementia                  | 0         | 3.58E-06    | 2.22E-142   |
| Cancer                    | 2.90E-38  | 0.002998129 | 8.85E-127   |
| Kidney Disease            | 5.69E-197 | 6.03E-09    | 1.25E-260   |
| Hyperlipidemia            | 1.58E-250 | 5.11E-20    | 0           |
| Heart Disease             | 2.43E-256 | 0.055419916 | 1.98E-176   |
| Covid-19 positive history | 3.86E-06  | 0.149719229 | 0.498448314 |
| Atrial Fibrillation       | 4.68E-189 | 6.28E-06    | 9.63E-157   |
| Pain Symptoms             | 3.69E-07  | 0.000502461 | 5.30E-54    |

Supplementary Table S8: P-values for the patient's reaction of statistical analysis

| Features           | Died      | SARS-CoV-2 test positive | Hospitalized |
|--------------------|-----------|--------------------------|--------------|
| Hospital Stay Days | 0         | 4.88E-95                 | 0            |
| Disable            | 7.09E-76  | 3.63E-05                 | 7.09E-76     |
| Headache           | 7.79E-13  | 3.02E-11                 | 7.79E-13     |
| Pyrexia            | 1.39E-07  | 7.16E-49                 | 1.39E-07     |
| Dyspnoea           | 5.10E-162 | 0                        | 5.10E-162    |
| Fatigue            | 0.0002295 | 4.68E-05                 | 0.000229457  |
| Chills             | 0.0276427 | 0.00856473               | 0.027642737  |
| Pain               | 6.16E-39  | 1.65E-55                 | 6.16E-39     |
| Dizziness          | 0.5887235 | 3.04E-54                 | 0.588723466  |
| Nausea             | 0.0042577 | 0.033687561              | 0.004257706  |
| Pain in extremity  | 4.78E-34  | 4.53E-106                | 4.78E-34     |
| Asthenia           | 1.70E-35  | 2.92E-88                 | 1.70E-35     |

|                          |           |             |             |
|--------------------------|-----------|-------------|-------------|
| Vomiting                 | 5.71E-17  | 1.23E-05    | 5.71E-17    |
| Malaise                  | 0.0311674 | 1.56E-36    | 0.0311674   |
| Cough                    | 3.99E-59  | 0           | 3.99E-59    |
| Injection site pain      | 0.0624723 | 2.00E-61    | 0.062472348 |
| Myalgia                  | 6.57E-10  | 9.27E-06    | 6.57E-10    |
| Hypoaesthesia            | 0.1553858 | 3.36E-42    | 0.155385773 |
| Chest pain               | 2.33E-18  | 0.178375787 | 2.33E-18    |
| Feeling abnormal         | 6.12E-10  | 1.74E-06    | 6.12E-10    |
| Rash                     | 0.0005803 | 6.39E-86    | 0.000580257 |
| Condition aggravated     | 5.93E-22  | 2.09E-29    | 5.93E-22    |
| Chest discomfort         | 8.24E-07  | 0.59509708  | 8.24E-07    |
| Arthralgia               | 6.41E-05  | 2.39E-34    | 6.41E-05    |
| Paraesthesia             | 0.5446063 | 2.02E-46    | 0.544606299 |
| Unresponsive to stimuli  | 1.63E-12  | 0.019741655 | 1.63E-12    |
| Diarrhoea                | 9.25E-07  | 9.38E-43    | 9.25E-07    |
| Pruritus                 | 1.66E-05  | 2.70E-92    | 1.66E-05    |
| Heart rate increased     | 0.3560273 | 7.15E-17    | 0.356027306 |
| Urticaria                | 1.65E-05  | 1.59E-80    | 1.65E-05    |
| Facial paralysis         | 0.0008205 | 7.78E-09    | 0.000820484 |
| Syncope                  | 0.0426228 | 2.57E-10    | 0.042622813 |
| Tachycardia              | 1.09E-13  | 4.25E-13    | 1.09E-13    |
| Palpitations             | 0.0078099 | 4.50E-21    | 0.007809903 |
| Hyperhidrosis            | 0.5857873 | 1.16E-12    | 0.585787253 |
| Erythema                 | 4.86E-06  | 1.10E-78    | 4.86E-06    |
| Throat tightness         | 0.0066261 | 8.57E-12    | 0.006626105 |
| Tremor                   | 0.733015  | 1.60E-10    | 0.733015003 |
| Blood pressure increased | 2.90E-06  | 5.31E-07    | 2.90E-06    |
| Anaphylactic reaction    | 0.0001342 | 6.95E-10    | 0.000134246 |
| Intensive care           | 2.05E-75  | 4.19E-126   | 2.05E-75    |
| Loss of consciousness    | 0.044628  | 5.26E-12    | 0.044628039 |
| Decreased appetite       | 1.70E-07  | 5.11E-23    | 1.70E-07    |

|                          |           |             |             |
|--------------------------|-----------|-------------|-------------|
| Muscular weakness        | 1.88E-09  | 0.000401598 | 1.88E-09    |
| Flushing                 | 0.8975687 | 2.58E-12    | 0.89756871  |
| Mobility decreased       | 0.0551621 | 1.35E-13    | 0.055162127 |
| Injection site erythema  | 0.9784857 | 5.58E-31    | 0.978485699 |
| Feeling hot              | 0.0650965 | 3.32E-15    | 0.065096524 |
| Abdominal pain           | 3.39E-13  | 1.12E-09    | 3.39E-13    |
| Injection site swelling  | 0.5166127 | 2.20E-31    | 0.516612685 |
| Cerebrovascular accident | 8.09E-37  | 0.539062628 | 8.09E-37    |
| Cardiac arrest           | 4.96E-05  | 1.05E-12    | 4.96E-05    |
| Lymphadenopathy          | 0.0005726 | 6.70E-35    | 0.000572649 |
